1 **TITLE:**

2 CRISPR/Cas9 gene editing to make conditional mutants of the human malaria parasite  
3 *Plasmodium falciparum*

5 **AUTHORS & AFFILIATIONS:**

6 Heather M. Kudyba<sup>1,2\*</sup>, David W. Cobb<sup>1\*</sup>, Anat Florentin<sup>1,2</sup>, Michelle Krakowiak<sup>1</sup>, and Vasant  
7 Muralidharan<sup>1,2</sup>

9 **\*Co-first authors**

11 <sup>1</sup>Department of Cellular Biology

12 <sup>2</sup>Center for Tropical and Emerging Global Diseases  
13 University of Georgia, Athens, GA, USA

15 **E-MAIL ADDRESSES:**

16 Heather M. Kudyba (hmbishop@uga.edu)

17 David W. Cobb (david.cobbjr25@uga.edu)

18 Anat Florentin (anat@uga.edu)

19 Michelle Krakowiak (michelle.krakowiak@gmail.com)

20 Vasant Muralidharan (vasant@uga.edu)

22 **CORRESPONDING AUTHOR:** vasant@uga.edu

24 **KEYWORDS:**

25 CRISPR, *Plasmodium*, *glmS*, knockdown, malaria, genetics

27 **SHORT ABSTRACT:**

28 We describe here a method for generating *glmS*-based conditional knockdown mutants in *P.*  
29 *falciparum* using CRISPR/Cas9 genome editing.

31 **LONG ABSTRACT:**

32 Malaria is a significant cause of morbidity and mortality worldwide. This disease, which  
33 primarily affects those living in tropical and subtropical regions, is caused by infection with  
34 *Plasmodium* parasites. The development of better drugs to combat malaria can be accelerated  
35 by improving our understanding of the biology of this complex parasite. Genetic manipulation  
36 of these parasites is key to understanding their biology, but historically, the genome of *P.*  
37 *falciparum* has been difficult to manipulate. Recently, CRISPR/Cas9 genome editing has been  
38 utilized in malaria parasites, allowing for easier protein tagging, generation of conditional  
39 protein knockdowns, and deletion of genes. CRISPR/Cas9 genome editing has proven to be a  
40 powerful tool for advancing the field of malaria research. Here, we describe a CRISPR/Cas9  
41 method for generating *glmS*-based conditional knockdown mutants in *P. falciparum*. The  
42 method is highly adaptable to other types of genetic manipulations, including protein tagging  
43 and gene knockouts.

44

45 **INTRODUCTION:**

46 Malaria is a devastating disease caused by protozoan parasites of the genus *Plasmodium*. *P.*  
47 *falciparum*, the most deadly human malaria parasite, causes approximately 445,000 deaths per  
48 year, mostly in children under the age of five<sup>1</sup>. *Plasmodium* has an intricate life cycle involving a  
49 mosquito vector and a vertebrate host. Humans become infected when an infected mosquito  
50 takes a blood meal. The parasite first invades the liver where they grow, develop, and divide for  
51 approximately one week. After this time, the parasites are released in the bloodstream where  
52 they undergo asexual replication in red blood cells (RBC). Growth of the parasites within the red  
53 blood cells are directly responsible for all of the clinical symptoms associated with malaria<sup>2</sup>.

54  
55 Until recently, production of transgenic *P. falciparum* was a laborious process, involving several  
56 rounds of drug selection that took many months and had a high rate of failure. This time-  
57 consuming procedure relies on the generation of random DNA breaks in the region of interest  
58 and the endogenous ability of the parasite to mend its genome through homologous repair<sup>3-6</sup>.  
59 Recently, Clustered Regularly Interspaced Palindromic Repeat/Cas9 (CRISPR/Cas9) genome  
60 editing has been successfully utilized in *P. falciparum*<sup>7,8</sup>. The introduction of this new  
61 technology in malaria research has been critical for advancing understanding of the biology of  
62 these deadly *Plasmodium* parasites. CRISPR/Cas9 allows for specific targeting of genes through  
63 the use of guide RNAs (gRNAs) that are homologous to the gene of interest. The gRNA/Cas9  
64 complex recognizes the gene through the gRNA and Cas9 introduces a double-strand break,  
65 forcing the organism to initiate repair mechanisms<sup>9,10</sup>. Because *P. falciparum* lacks the  
66 machinery to repair DNA breaks via non-homologous end joining, it utilizes homologous  
67 recombination mechanisms and integrates transfected homologous DNA templates to repair  
68 the Cas9/gRNA induced double-strand break<sup>11,12</sup>.

69  
70 Here we present a protocol for the generation of conditional knockdown mutants in *P.*  
71 *falciparum* using CRISPR/Cas9 genome editing. The protocol demonstrates usage of the *glmS*  
72 ribozyme to conditionally knockdown protein level of PfHsp70x (PF3D7\_0831700), a chaperone  
73 exported by *P. falciparum* into the host red blood cell (RBC)<sup>13,14</sup>. The *glmS* ribozyme is activated  
74 by treatment with glucosamine (which is converted to glucosamine-6-phosphate within cells) to  
75 cleave its associated mRNA, leading to reduction in protein<sup>14</sup>. This protocol is easily adapted to  
76 utilize other conditional knockdown tools such as destabilization domains or RNA aptamers<sup>4,5,15</sup>.  
77 Our protocol details the generation of a repair plasmid consisting of a hemagglutinin (HA) tag  
78 and *glmS* ribozyme coding sequence flanked by sequences homologous to the PfHsp70x open  
79 reading frame (ORF) and 3'UTR. We also describe the generation of a second plasmid to drive  
80 expression of the gRNA. These two plasmids, along with a third plasmid that drives expression  
81 of Cas9, are transfected into RBCs and used to modify the genome of *P. falciparum* parasites.  
82 Finally, we describe a polymerase chain reaction (PCR)-based technique to verify integration of  
83 the tag and *glmS* ribozyme. This protocol is highly adaptable for the modification or complete  
84 knockout of any *P. falciparum* genes, enhancing our ability to generate new insights into the  
85 biology of the malaria parasite.

86  
87 **PROTOCOL:**

88 **Ethics Statement:** Continuous culture of *P. falciparum* requires the use of human RBCs and we  
89 utilize commercially purchased units of blood that are stripped of all identifiers and  
90 anonymized. The Institutional Review Board and the Office of Biosafety at the University of  
91 Georgia have reviewed our protocols and approved all protocols used in our lab.

92

## 93 **1. Choose gRNA sequence**

94

95 1.1. Go to CHOP CHOP (<http://chopchop.cbu.uib.no/>) and select FASTA target. Under “Target”,  
96 paste the 200 base pairs from the 3’ end of the open reading frame (ORF) of a gene and 200  
97 base pairs from the start of the gene’s 3’UTR. Under “In”, select the species to be *P. falciparum*  
98 (3D7 v3.0) and select CRISPR/Cas9 under “Using”. Next, click “Find Target Sites”.

99

100 1.2. Select a gRNA sequence from the options presented, giving preference to the most efficient  
101 gRNA that is closest to your site of modification and that has the fewest off-target sites.

102

103 Note: Potential gRNA sequences are identified because they are immediately upstream of a  
104 Protospacer Adjacent Motif (PAM), which is required for recruitment of Cas9 to DNA. The  
105 sequence that is cloned into pMK-U6, the vector that drives gRNA expression, is the 20 bases  
106 immediately upstream of the PAM. The PAM specific for *S. pyogenes* Cas9 is the nucleotide  
107 sequence NGG and should not be included in the sequence that is cloned into pMK-U6.

108

109 CHOP CHOP visually ranks the gRNA sequences, displaying the best options in green, the less  
110 ideal options in amber, and the worst options in red. CHOP CHOP gives each gRNA sequence an  
111 efficiency score that is calculated using the most up-to-date parameters found in the literature,  
112 and they predict off-target sites that could be recognized by the gRNA. Two or three gRNA  
113 sequences may need to be tried to find the gRNA best suited to a particular gene.

114

115 1.3. Purchase the gRNA sequence and its reverse-complement as Polyacrylamide Gel  
116 Electrophoresis-purified oligos; the gRNA sequence used to target PfHSP70x can be found in  
117 **Figure 1B**.

118

119 Note: This oligo should include 15 base pairs homologous to the gRNA-expressing plasmid,  
120 which are necessary for sequence and ligation-independent cloning (SLIC) into the pMK-U6  
121 vector<sup>16</sup>.

122

## 123 **2. Clone gRNA sequence into pMK-U6**

124

125 2.1. Digest pMK-U6 with BtgZI.

126

127 2.1.1. Digest 10 µg of pMK-U6 with 5 µL of BtgZI enzyme (5000 units/mL) for 3 h at 60 °C.  
128 Follow the enzyme manufacturer’s protocol for reaction conditions.

129

130 2.1.2. After the 3 h incubation, add an additional 3  $\mu$ L BtgZI to the reaction to ensure complete  
131 digestion of the plasmid. Digest for an additional 3 h, again following manufacturer's  
132 instructions for ensuring the correct reaction condition.

133

134 2.1.3. To purify the digested pMK-U6 from the reaction, use a column-based PCR cleanup kit  
135 according to manufacturer's instructions.

136

137 2.1.4. Separate the digested DNA using a 0.7% agarose gel and extract the 4,200 base pair band.

138

139 2.2. Anneal the oligos containing the gRNA sequence.

140

141 2.2.1. Reconstitute the PAGE-purified oligos to a concentration of 100  $\mu$ M using nuclease free  
142 water.

143

144 2.2.2. Combine 10  $\mu$ L of each oligo with 2.2  $\mu$ L 10x buffer 2 (see the Table of Materials); the  
145 total reaction volume will be 22.2  $\mu$ L.

146

147 2.2.3. Run the gRNA annealing program in a thermocycler: Step 1- 95  $^{\circ}$ C, 10 min; step 2- 95  $^{\circ}$ C, 1  
148 s, with a reduction in temperature of 0.6  $^{\circ}$ C/cycle; step 3- Go to step 2, 16 times; step 4- 85  $^{\circ}$ C,  
149 1 min; step 5- 85  $^{\circ}$ C, 1 s, with a reduction in temperature of 0.6 $^{\circ}$ C/cycle; step 6- Go to step 5, 16  
150 times; step 7- 75  $^{\circ}$ C, 1 min; step 8- 75  $^{\circ}$ C, 1 s, with a reduction in temperature of 0.6  $^{\circ}$ C/cycle;  
151 step 9- Go to step 8, 16 times. Steps 10-21- Repeat the procedure used in Steps 4-9 until the  
152 temperature reaches 25  $^{\circ}$ C; step 22- 25  $^{\circ}$ C, 1 min.

153

154 2.3. Insert the annealed gRNA oligos into the BtgZI-digested and gel-purified pMK-U6 plasmid.

155

156 2.3.1. Combine 100 ng digested pMK-U6 with 1  $\mu$ L 10x buffer 2.1 and 3  $\mu$ L annealed gRNA  
157 oligos. Bring the volume up to 9.5  $\mu$ L with nuclease-free water.

158

159 2.3.2. Add 0.5  $\mu$ L T4 polymerase and incubate reaction at room temperature for 2 min 30 s.

160

161 2.3.3. Move the reaction to ice and incubate for 10 min.

162

163 2.3.4. Immediately transform 5  $\mu$ L of the reaction into competent *E. coli* according to  
164 manufacturer's instructions and plate bacteria on Lysogeny Broth (LB) agar plates containing  
165 100  $\mu$ g/mL Ampicillin.

166

167 2.3.5. Allow transformed bacteria to grow at 37  $^{\circ}$ C overnight, then select colonies for DNA  
168 extraction with a commercially available plasmid miniprep kit.

169

### 170 3. Design homology regions of the repair template

171

172 3.1. Design shield mutations within the homology repair template to prevent re-cutting of DNA  
173 that is integrated into the genome.

174

175 Note: The shield mutation typically consists of introducing a silent mutation to alter the  
176 protospacer adjacent motif (PAM) so that Cas9 will not induce a break in the repair template.  
177 The PAM required for the Cas9 used here is the nucleotide sequence NGG, where N is any  
178 nucleotide. If possible, change one of the G nucleotides to an A, C, or T.

179

180 3.1.1. If the PAM cannot be silently mutated, introduce at least two silent mutations into the six  
181 base pairs directly adjacent to the PAM<sup>7,8</sup>.

182

183 Note: These mutations will prevent recognition of the repair template by the gRNA and prevent  
184 re-cutting of the repaired locus by the Cas9/gRNA complex. The shield mutations can be  
185 introduced into the homology region by amplifying the DNA with primers that contain the  
186 mutation.

187

188 3.2. Amplify the ORF homology region for the repair template.

189

190 3.2.1. Using PCR, amplify 800 base pairs from the 3' end of the target gene's ORF. Design the  
191 primers to be used to exclude the stop codon from this amplicon.

192

193 3.2.2. Additionally, design the primers to insert this amplicon into pHA-*glmS* that has been  
194 digested with SacII and AfeI, either through a DNA ligation reaction or SLIC<sup>16</sup>

195

196 3.3. Amplify the 3'UTR homology region for the repair template.

197

198 3.3.1. Using PCR, amplify the 800 base pairs immediately following the stop codon of the target  
199 gene. The primers used should be designed to insert this amplicon into pHA-*glmS* that has been  
200 digested with HindIII and NheI, either through a DNA ligation reaction or SLIC<sup>16</sup>.

201

202 Note: The high AT content of the *P. falciparum* genome often makes amplification of regions  
203 such as UTRs difficult. An alternative approach to using PCR is to synthesize the homology  
204 regions.

205

#### 206 **4. Clone homology regions into the repair plasmid**

207

208 4.1. Insert ORF homology region into pHA-*glmS*.

209

210 4.1.1. Digest pHA-*glmS* with SacII and AfeI, according to enzyme manufacturer's instructions,  
211 and insert the ORF homology region PCR product into the digested plasmid using SLIC<sup>16</sup>.

212

213 4.1.2. Transform into competent *E. coli*.

214

215 4.2. Insert 3'UTR homology region into pHA-*glmS* plasmid that already contains the ORF  
216 homology region (see 4.1).

217

218 4.2.1. Digest the plasmid with HindIII and NheI according to enzyme manufacturer's  
219 instructions, and then insert the 3' UTR homology region amplicon into the digested plasmid  
220 using SLIC<sup>16</sup>.

221

222 4.2.2. Transform into competent *E. coli*. See steps 2.3.4 and 2.3.5 above.

223

## 224 **5. Precipitate DNA for transfection**

225

226 5.1. Add 40 µg each of pMK-U6, pUF1-Cas9, and pHA-*gImS* DNA (for a total of 120 µg of DNA)  
227 into a sterile 1.5 mL microcentrifuge tube.

228

229 5.2. Add 1/10th the volume of DNA of 3M sodium acetate in water (pH 5.2) to the tube and mix  
230 well using a vortex. For example, if the volume in step 5.1 was 100 µL, add 10 µL sodium  
231 acetate.

232

233 5.3. Add 2.5 volumes of 100% ethanol to the tube and mix well using a vortex for at least 30 s.  
234 For example, if the volume in 5.1 was 100 µL, add 250 µL 100% ethanol.

235

236 5.4. Place the tube on ice or at -20 °C for 30 min.

237

238 5.5. Centrifuge the tube at 18,300g for 30 min at 4 °C.

239

240 5.6. Carefully remove the supernatant from the tube. Do not disturb the pellet.

241

242 5.7. Add 3 volumes of 70% ethanol to the tube and mix briefly using a vortex. For example, if  
243 the volume in 5.1 was 100 µL, add 300 µL 70% ethanol.

244

245 5.8. Centrifuge the tube at 18,300g for 30 min at 4 °C.

246

247 Note: This step should be performed under sterile conditions in a biological safety cabinet.

248

249 5.9. Carefully remove the supernatant from the tube. Do not disturb the pellet. Leave the tube  
250 open and allow the pellet to air dry for 15 min.

251

252 5.10. Store the precipitated DNA at -20 °C until it is needed for transfection.

253

## 254 **6. Isolate human RBCs from whole blood in preparation for transfection.**

255

256 6.1. Aliquot fresh blood into sterile 50 mL conical tubes (approximately 25 mL per tube).

257

258 6.2. Centrifuge tubes at 1088g for 12 min, with centrifuge brakes set to 4.

259

260 6.3. Aspirate off supernatant and buffy coat.

261

262 6.4. Resuspend RBC pellet with equal volume incomplete RPMI.

263

264 Note: Incomplete RPMI is prepared by supplementing RPMI 1640 with 10.32  $\mu$ M thymidine,  
265 110.2  $\mu$ M hypoxanthine, 1 mM sodium pyruvate, 30 mM sodium bicarbonate, 5 mM HEPES,  
266 11.1 mM glucose, and 0.02% (v/v) gentamicin.

267

268

269 6.5. Repeat steps 6.2-6.4 twice.

270

271 6.6. After the last wash, resuspend RBCs in equal volume incomplete RPMI and store at 4 °C.

272

## 273 **7. Transfect RBCs with the CRISPR/Cas9 plasmids (to be done aseptically)**

274

275 Note: Plasmodium falciparum cultures are maintained as described<sup>17</sup>. Whenever blood is used  
276 in the protocol, it is referring to pure red blood cells prepared in Step 6. Blood used should not  
277 be older than 6 weeks, as we see a decrease in parasite proliferation in older blood. We  
278 describe here a protocol for pre-loading RBCs with DNA and then adding parasite culture to the  
279 transfected cells. Other established transfection protocols would be compatible with  
280 transfecting these constructs<sup>18,19</sup>.

281

282 7.1. Prepare 1x cytomix buffer in water (120 mM KCl, 0.15 mM CaCl<sub>2</sub>, 2mM EGTA, 5mM MgCl<sub>2</sub>,  
283 10mM K<sub>2</sub>HPO<sub>4</sub>, 25mM HEPES, pH 7.6). Filter-sterilize the buffer using a 0.22  $\mu$ M filter.

284

285 7.2. Add 380  $\mu$ L of 1x cytomix to the DNA precipitated in step 5 and vortex to dissolve. Allow  
286 the DNA to dissolve in 1x cytomix for 10 minutes, vortexing every 3 minutes for 10 seconds.

287

288 7.3. In a sterile 15 mL conical tube, combine 300  $\mu$ L of red blood cells (RBCs, 50% hematocrit,  
289 from Step 6) in incomplete RPMI with 4 mL of 1x cytomix.

290

291 7.4. Centrifuge the RBCs from 7.3 at 870g for 3 min, then remove the supernatant from the RBC  
292 pellet.

293

294 7.5. Resuspend the RBC pellet with DNA/cytomix mixture from step 6.2 and transfer to a 0.2 cm  
295 electroporation cuvette.

296

297 7.6. Electroporate the RBCs using the following conditions: 0.32kV, 925  $\mu$ F, capacitance set to  
298 "High Cap", and resistance set to "infinite".

299

300 7.7. Following electroporation, transfer the contents from the cuvette to a 15 mL conical  
301 containing 5 mL of complete RPMI (cRPMI). Centrifuge the tube at 870g for 3 min at 20 °C, then  
302 decant the supernatant.

303

304 Note: cRPMI is prepared as described for incomplete RPMI in 7.4 with the addition of 0.25%  
305 (w/v) lipid-rich bovine serum albumin.

306

307 7.8. Resuspend the pellet in 4 mL cRPMI and transfer to a well of a 6-well tissue culture plate.  
308 Add 400  $\mu$ L of a high-schizont culture (7-10% schizont parasitemia is ideal) to the transfected  
309 RBCs.

310

311 Note: Parasitemia is defined as the percentage of parasite-infected RBCs.

312

313 7.9. The next day, wash the culture with 4 mL of cRPMI.

314

315 7.9.1. Centrifuge the culture at 870g for 3 min and aspirate the supernatant. Resuspend the  
316 culture in 4 mL cRPMI.

317

318 7.10. 48 h after step 7.6, wash the culture with 4 mL of cRPMI, then resuspend the culture in  
319 cRPMI containing 1  $\mu$ M DSM1 to select for the Cas9 plasmid.

320

321 7.11. Continue washing the cultures each day with cRPMI until parasites are no longer visible by  
322 blood smear. After this point, the culture medium should be replaced with fresh cRPMI + 1  $\mu$ M  
323 DSM1 every 48 h.

324

325 7.11.1. To make a blood smear, pipette 150  $\mu$ L of culture into an 0.6 mL eppendorf tube. Pellet  
326 the cells by centrifugation at 1700g for 30 s.

327

328 7.11.2. Aspirate off the supernatant. Use a pipette to transfer the pelleted cells to a glass slide.  
329 Using a second glass slide, held at a 45° angle to the first slide, smear the blood droplet. Stain  
330 the slide using a commercially available staining kit according to the manufacturer's protocol.

331

332 7.11.3 View parasites using a 100x oil immersion objective.

333

334 7.12. Beginning 5 days post-transfection (Step 7.6), remove 2 mL of the culture, with RBCs  
335 resuspended in the culture medium, and add back 2 mL fresh medium (cRPMI + 1  $\mu$ M DSM1) and  
336 blood at 2% hematocrit. Add fresh blood in this manner once a week until parasites reappear,  
337 as determined by thin blood smear.

338

339 Note: If integration is successful, parasites generally reappear in culture by one-month post-  
340 transfection.

341

342 7.13. Once parasites reemerge, remove drug pressure. Alternatively, remove drug pressure  
343 after parasites have been cloned out.

344

## 345 **8. Check parasites for integration of the repair template**

346

347 8.1. When parasites are visible again by thin blood smear, isolate DNA from the culture.

348



349 8.2. Use PCR to amplify the modified region of the genome to determine whether the targeted  
350 locus has been successfully altered and whether the unmodified *wild-type* locus (indicative of  
351 *wild-type* parasites) is detectable.

352

353 8.2.1. To detect parasites that have integrated the repair template, use a forward primer that  
354 sits at the beginning of the ORF, outside of the cloned homology region. Use a reverse primer  
355 that sits in the 3'UTR.

356

357 Note: As this amplification includes the sequences of the HA tags and *glmS* ribozyme, amplicons  
358 from integrated parasites will be longer than the same region amplified in *wild-type* parasites.

359

## 360 9. Clone parasites by limiting dilution

361

362 9.1 Perform serial dilutions of the parasite culture from step 7.13 to achieve a final  
363 concentration of 0.5 parasites/200  $\mu$ L.

364

365 9.1.1. Prepare 1 mL culture in cRPMI at 5% parasitemia and 2% hematocrit; at this parasitemia  
366 and hematocrit, the culture contains  $1 \times 10^7$  parasites/mL.

367

368 9.1.2. Dilute this culture 1:100 with cRPMI. Dilute again 1:100 with cRPMI.

369

370 9.1.3. Dilute 1:400. Perform this dilution by adding 62.5  $\mu$ L culture to 25 mL cRPMI and 1 mL  
371 blood. This dilution results in the desired concentration of 0.5 parasites/200  $\mu$ L.

372

373 9.1.5. Add 200  $\mu$ L of the diluted culture to the wells of a 96-well tissue culture plate.

374

375 9.2. Maintain the cloning plate until parasites are detectable in the wells.

376

377 9.2.1. Every 48 h, replace the medium in the 96-well plate with fresh medium.

378

379 9.2.2. Once a week, starting 5 days after beginning the cloning plate (Step 8.1.5), remove 100  $\mu$ L  
380 from each well and add back 100  $\mu$ L of fresh medium + blood (2% hematocrit).

381

382 9.3. Identify wells containing parasites.

383

384 9.3.1. Place the 96-well plate at a 45° angle for approximately 20 min, allowing the blood to  
385 settle at an angle within the plate.

386

387 9.3.2. Place the 96-well plate on a light box. Observe that the wells containing parasites will  
388 contain medium that is yellow in color, compared to the pink medium of parasite-free wells,  
389 due to acidification of the medium by the parasites.

390

391 9.3.3. Using a serological pipette, move the contents of the parasite-containing wells to a 24-  
392 well tissue culture plate to allow expansion of parasitemia.

393

394 9.3.4. Using PCR analysis as described in Step 8, check these clonal parasite lines for correct  
395 integration.

396

397 **10. Knockdown protein by treating parasites with GlcN and confirm knockdown by Western**  
398 **blot analysis.**

399

400 10.1. Prepare 0.5 M GlcN stock solution; the stock can be stored at -20° C.

401

402 10.2. Add GlcN to *glmS* parasite cultures and allow to grow in the presence of GlcN.

403

404 Note: The final concentration and timing of GlcN treatment to be used is dependent upon the  
405 experiment and parasite line. GlcN can impact parasite growth, so the parental parasite strain  
406 should be exposed to a range of GlcN concentrations to determine sensitivity to the compound.  
407 Often, a concentration of 2.0-7.5 mM GlcN is used<sup>13,14,20</sup>.

408

409 10.3. Isolate protein samples from GlcN-treated parasites<sup>13</sup>.

410

411 10.4. Use protein samples for Western blot analysis to detect reduction in protein<sup>13</sup>.

412

413 10.4.1. Use an anti-HA antibody according to manufacturer's instructions to detect the HA-  
414 *glmS*-tagged protein, and compare the HA band to a loading control, such as PEF1 $\alpha$ .

415

#### 416 **REPRESENTATIVE RESULTS:**

417 A schematic of the plasmids used in this method as well as an example of a shield mutation are  
418 shown in **Figure 1**. As an example of how to identify mutant parasites after transfection, results  
419 from PCRs to check integration of the HA-*glmS* construct is shown in **Figure 2**. A representative  
420 image of a cloning plate is shown in **Figure 3** to demonstrate the color change of the medium in  
421 the presence of parasites. Results from an immunofluorescence assay and Western blotting  
422 experiments are shown in **Figure 4** to demonstrate the functionality of the HA tag and *glmS*-  
423 based reduction of protein in the parasites. **Figure 5** demonstrates the inability of short  
424 homology arms on PCR products to modify the parasites genome and obtain viable mutants.

425

#### 426 **FIGURE LEGENDS:**

427

428 **Figure 1: Summary of our three-plasmid approach to CRISPR/Cas9 and examples of a gRNA**  
429 **oligo and shield mutation.** A) Schematics of empty pHA-*glmS* and pMK-U6 are shown with the  
430 restriction enzyme sites used for cloning. Also shown are pHA-*glmS* and pMK-U6 after the  
431 homology arms and gRNA sequences have been cloned into them, respectively. Finally, pUF1-  
432 Cas9 is shown. yDHOD: yeast dihydrofolate reductase, the resistance marker to DSM1. B) The  
433 forward oligo used for cloning the PfHsp70x gRNA sequence into pMK-U6 is shown, with the  
434 gRNA sequence in capital letters and the pMK-U6 homology arms necessary for cloning shown  
435 in lower case (Top). The genomic target of the PfHsp70x gRNA is shown as well as the

436 downstream PAM, in red (Middle). The shield mutation in the PfHsp70x gRNA PAM is shown in  
437 red (Bottom).

438

439 **Figure 2: Schematic of CRISPR/Cas9 genome modification using pHA-glmS and strategy for**  
440 **confirming integration.** A) Cas9, guided to a genomic locus by a gRNA, induces a double strand  
441 break in the DNA. The parasite repairs the damage through double crossover homologous  
442 repair, using the pHA-glmS plasmid as a template and introducing the HA-glmS sequence into  
443 the genome. B) A PCR test to identify correct integration of the HA-glmS sequence. Using  
444 primers P1 and P2, the 3' ORF of *wild-type* PfHsp70x and PfHsp70x-*glmS* mutants are  
445 amplified<sup>13</sup>. The amplicon from PfHsp70x-*glmS* is longer than *wild-type* due to insertion of the  
446 HA-glmS sequence.

447

448 **Figure 3: Identification of wells containing parasites in a 96-well cloning plate.** A) The 96-well  
449 plate is set at a 45° angle for approximately 20 minutes to allow the blood to settle at an angle  
450 in the plate. B) The well on the left contains a parasite culture, indicated by the yellow color of  
451 the medium in comparison to the pink medium of the parasite-free well on the right.

452

453 **Figure 4: An immunofluorescence assay shows the correct HA-tagging of PfHsp70x and**  
454 **Western blotting shows reduction of PfHsp70x protein levels during treatment with**  
455 **glucosamine.** A) PfHsp70x-*glmS* parasites were fixed and stained with DAPI (nucleus marker)  
456 and antibodies to HA and MAHRP1 (Membrane Associated Histidine Rich Protein 1, a marker of  
457 protein export to the host RBC)<sup>13</sup>. B) PfHsp70x-*glmS* parasites were treated with 7.5 mM  
458 glucosamine and whole-parasite lysates were used for Western blotting analysis<sup>13</sup>. The  
459 membrane was probed with antibodies for HA and PfEF1 $\alpha$  as a loading control<sup>13</sup>. As expected,  
460 glucosamine treatment results in a reduction of the protein.

461

462 **Figure 5: Using short homology sequences for repair.** A) Schematic representation showing  
463 knockout of GFP in B7 parasites<sup>21</sup>. B7 parasites are a derivative of 3D7 where Plasmeprin II has  
464 been tagged with GFP. PCR products containing 50, 75, or 100 base pairs of GFP homology  
465 regions flanking a blasticidin S resistance cassette (labeled “marker”), along with pUF1-Cas9-  
466 eGFP-gRNA, a plasmid expressing Cas9 and a GFP gRNA, were transfected into B7 parasites.  
467 Each transfection was carried out twice. Drug pressure (DSM1) was applied 2-day post  
468 transfection. B) PCR test on DNA isolated from transfected parasites five days post-transfection  
469 and two months post-transfection. Primers used to test integration of the BSD resistance  
470 cassette will yield a 584 base pair product for B7 parental parasites and a 2020 base pair  
471 product for parasites that have integrated the marker.

472

## 473 **DISCUSSION:**

474 The implementation of CRISPR/Cas9 in *P. falciparum* has both increased the efficiency of and  
475 decreased the amount of time needed for modifying the parasite's genome, in comparison to  
476 previous methods of genetic manipulation. The comprehensive protocol described in this  
477 manuscript outlines the steps taken to generate conditional mutants using CRISPR/Cas9 in  
478 *Plasmodium falciparum*. While the method here is written specifically for the generation of HA-

479 *glmS* mutants, this strategy can be adapted for a variety of purposes, including the tagging of  
480 genes, gene knockouts, and introduction of point mutations.

481  
482 A critical early step in this protocol is the selection of a gRNA sequence. When selecting a gRNA,  
483 there are several considerations to keep in mind in regards to where the gRNA sits, how  
484 efficient it is, and whether it has the potential for off-target effects. Typically, the gRNA  
485 sequence should be as close as possible to the site of modification, ideally within 200 bp. This  
486 will decrease the likelihood of the parasites using the repair template to fix their genome  
487 without integrating the tag. The tool used here to locate a gRNA was a free online service called  
488 CHOP CHOP<sup>22</sup>. Another online tool, Eukaryotic Pathogen CRISPR guide RNA/DNA Design Tool  
489 (EuPaGDT, <http://grna.ctegd.uga.edu/>), can also be used<sup>23</sup>. EuPaGDT provides additional  
490 characterization of gRNA sequences, including prediction of off-target hits and potential issues  
491 that may prevent transcription of the gRNA. EuPaGDT also has tools for batch processing of  
492 gRNAs to target multiple genes or whole genomes. The gRNA chosen should be one that sits  
493 closest to the site of modification with the highest efficiency and minimal off-target hits. An  
494 important limitation to CRISPR/Cas9 gene editing that may arise is the inability to design a  
495 suitable gRNA to target the gene of interest. In such cases, a trial-and-error approach may be  
496 needed, using multiple sub-optimal gRNA sequences until the best one is found and successful  
497 gene editing has occurred.

498  
499 Another important consideration for generating *P. falciparum* mutants using CRISPR/Cas9 is the  
500 length of the homology regions used in the repair template. The protocol here states that the  
501 homology regions should be approximately 800 base pairs each, but we have also been  
502 successful in using smaller regions (500 base pairs)<sup>3</sup>. Successful genome modification using  
503 CRISPR/Cas9 and short homology arms on PCR products have been used in other protozoan  
504 parasites such as *Toxoplasma gondii* and *Trichomonas vaginalis*<sup>24,25</sup>. We tested the feasibility of  
505 using smaller homology arms on PCR products (50, 75, or 100 base pairs) by attempting to  
506 knockout GFP in B7 parasites using a blasticidin resistance cassette<sup>21</sup>. We saw some integration  
507 of the blasticidin resistance cassette at five days post transfection; however, these parasites  
508 never recovered from transfection. For these transfections, we selected for the Cas9-expressing  
509 plasmid using DSM1. A different selection method, such as treating transfected cultures with  
510 blasticidin S alone or in combination with DSM1, may improve the chances of parasites  
511 reappearing when using shorter homology regions for repairing the Cas9/gRNA induced break.  
512 We did not select with blasticidin S in this case because we wanted to test whether short  
513 homology arms could be used in instances where a drug resistance cassette is not being  
514 integrated into the genome, such as when a protein is being tagged.

515  
516 The core components of CRISPR/Cas9 gene editing discussed here are the Cas9 endonuclease,  
517 the gRNA, and the repair template. We describe a three-plasmid approach to introduce these  
518 components into the parasites, where Cas9, the gRNA, and the repair template are found in  
519 separate plasmids. In addition to this approach, our lab has been successful in using a two-  
520 plasmid approach where Cas9 and gRNA expression are driven by a single plasmid and the  
521 repair template is found in a second plasmid<sup>3</sup>. Similar two-plasmid approaches have been  
522 successfully employed by other labs to generate mutants<sup>7,8,26-29</sup>. Furthermore, a few labs are

523 using a strain of *Plasmodium* (NF54<sup>attB</sup>) which constitutively expresses Cas9 and a T7 RNA  
524 polymerase to drive expression of gRNA's<sup>30</sup>. In this case, a single plasmid containing the repair  
525 template and the gRNA are transfected into NF54<sup>attB</sup> parasites<sup>31,32</sup>. A plasmid-free approach,  
526 utilizing a purified Cas9-gRNA ribonucleoprotein complex, has been used to insert mutations  
527 into the genome as well<sup>33</sup>. The success of these different approaches demonstrates flexibility in  
528 how researchers can introduce the Cas9/gRNA components into the parasite.

529  
530 Finally, the choice of drug pressure to apply to transfected parasites can be altered depending  
531 on constructs used. Here, we show successful generation of mutants by transiently selecting for  
532 the Cas9 expressing plasmid using DSM1 until parasites reappear. To generate PfHsp70x  
533 knockout parasites, *pfhsp70x* was replaced with the human dihydrofolate reductase gene, and  
534 parasites were selected using WR99210<sup>13</sup>. The recently described TetR-PfDOZI knockdown  
535 system relies on integration of a plasmid containing a blasticidin S resistance gene, allowing for  
536 selection of parasites using blasticidin S<sup>15,31</sup>.

537  
538 CRISPR/Cas9 gene editing of *P. falciparum* has proven to be a powerful tool in malaria research,  
539 and we have detailed here a method for generating conditional knockdown mutants<sup>3,7,8,13,20,28</sup>.  
540 The protocol is highly adaptable to individual research interests.

541

542

#### 543 **ACKNOWLEDGMENTS:**

544 We thank Muthugapatti Kandasamy at the University of Georgia Biomedical Microscopy Core  
545 for technical assistance and Jose-Juan Lopez-Rubio for sharing the pUF1-Cas9 and pL6 plasmids.  
546 This work was supported by ARCS Foundation awards to D.W.C. and to H.M.K., UGA startup  
547 funds to V.M., grants from the March of Dimes Foundation (Basil O'Connor Starter Scholar  
548 Research Award) to V.M., and the US National Institutes of Health (R00AI099156 and  
549 R01AI130139) to V.M. and (T32AI060546) to H.M.K.

550

#### 551 **DISCLOSURES:**

552 The authors have nothing to disclose

553

#### 554 **REFERENCES**

555

- 556 1 World Health Organization. World Malaria Report. *WHO, Geneva*. (2017).
- 557 2 Miller, L. H., Baruch, D. I., Marsh, K. & Doumbo, O. K. The pathogenic basis of  
558 malaria. *Nature*. **415** (6872), 673-679, (2002).
- 559 3 Florentin, A. *et al.* PfClpC Is an Essential Clp Chaperone Required for Plastid  
560 Integrity and Clp Protease Stability in *Plasmodium falciparum*. *Cell Rep*. **21** (7),  
561 1746-1756, (2017).
- 562 4 Muralidharan, V., Oksman, A., Pal, P., Lindquist, S. & Goldberg, D. E.  
563 *Plasmodium falciparum* heat shock protein 110 stabilizes the asparagine repeat-  
564 rich parasite proteome during malarial fevers. *Nat Commun*. **3** 1310-1310,  
565 (2012).
- 566 5 Muralidharan, V., Oksman, A., Iwamoto, M., Wandless, T. J. & Goldberg, D. E.

- 567 Asparagine repeat function in a Plasmodium falciparum protein assessed via a  
568 regulatable fluorescent affinity tag. *Proc Natl Acad Sci U S A.* **108** (11), 4411-  
569 4416, (2011).
- 570 6 Beck, J. R., Muralidharan, V., Oksman, A. & Goldberg, D. E. PTEX component  
571 HSP101 mediates export of diverse malaria effectors into host erythrocytes.  
572 *Nature.* **511** (7511), 592-595, (2014).
- 573 7 Ghorbal, M. *et al.* Genome editing in the human malaria parasite Plasmodium  
574 falciparum using the CRISPR-Cas9 system. *Nat Biotechnol.* **32** (8), 819-821,  
575 (2014).
- 576 8 Wagner, J. C., Platt, R. J., Goldfless, S. J., Zhang, F. & Niles, J. C. Efficient  
577 CRISPR-Cas9-mediated genome editing in Plasmodium falciparum. *Nat*  
578 *Methods.* **11** (9), 915-918, (2014).
- 579 9 Doudna, J. A. & Charpentier, E. Genome editing. The new frontier of genome  
580 engineering with CRISPR-Cas9. *Science.* **346** (6213), 1258096, (2014).
- 581 10 Wang, H., La Russa, M. & Qi, L. S. CRISPR/Cas9 in Genome Editing and  
582 Beyond. *Annu Rev Biochem.* **85** 227-264, (2016).
- 583 11 Kirkman, L. A. & Deitsch, K. W. Antigenic variation and the generation of diversity  
584 in malaria parasites. *Curr Opin Microbiol.* **15** (4), 456-462, (2012).
- 585 12 Lee, A. H., Symington, L. S. & Fidock, D. A. DNA Repair Mechanisms and Their  
586 Biological Roles in the Malaria  
587 Parasite Plasmodium falciparum. *Microbiology and Molecular Biology Reviews.* **78** (3),  
588 469-486, (2014).
- 589 13 Cobb, D. W. *et al.* The Exported Chaperone PfHsp70x Is Dispensable for the  
590 Plasmodium falciparum Intraerythrocytic Life Cycle. *mSphere.* **2** (5), (2017).
- 591 14 Prommana, P. *et al.* Inducible knockdown of Plasmodium gene expression using  
592 the glmS ribozyme. *PLoS One.* **8** (8), e73783, (2013).
- 593 15 Ganesan, S. M., Falla, A., Goldfless, S. J., Nasamu, A. S. & Niles, J. C. Synthetic  
594 RNA-protein modules integrated with native translation mechanisms to control  
595 gene expression in malaria parasites. *Nat Commun.* **7** 10727, (2016).
- 596 16 Li, M. Z. & Elledge, S. J. Harnessing homologous recombination in vitro to  
597 generate recombinant DNA via SLIC. *Nat Methods.* **4** (3), 251-256, (2007).
- 598 17 Drew, M. E. *et al.* Plasmodium food vacuole plasmepsins are activated by  
599 falcipains. *J Biol Chem.* **283** (19), 12870-12876, (2008).
- 600 18 WU, Y., SIFRI, C. D., LEI, H.-H., SU, X.-Z. & WELLEMS, T. E. Transfection of  
601 Plasmodium falciparum within human red blood cells. *Proc Natl Acad Sci U S A.*  
602 **92** 973-977, (1995).
- 603 19 Janse, C. J. *et al.* High efficiency transfection of Plasmodium berghei facilitates  
604 novel selection procedures. *Mol Biochem Parasitol.* **145** (1), 60-70, (2006).
- 605 20 Counihan, N. A. *et al.* Plasmodium falciparum parasites deploy RhopH2 into the  
606 host erythrocyte to obtain nutrients, grow and replicate. *Elife.* **6**, (2017).
- 607 21 Klemba, M., Beatty, W., Gluzman, I. & Goldberg, D. E. Trafficking of plasmepsin  
608 II to the food vacuole of the malaria parasite Plasmodium falciparum. *J Cell Biol.*  
609 **164** (1), 47-56, (2004).
- 610 22 Labun, K., Montague, T. G., Gagnon, J. A., Thyme, S. B. & Valen, E.  
611 CHOPCHOP v2: a web tool for the next generation of CRISPR genome  
612 engineering. *Nucleic Acids Res.* **44** (W1), W272-276, (2016).

- 613 23 Peng, D. & Tarleton, R. EuPaGDT: a web tool tailored to design CRISPR guide  
614 RNAs for eukaryotic pathogens. *Microb Genom.* **1** (4), e000033, (2015).
- 615 24 Shen, B., Brown, K. M., Lee, T. D. & Sibley, L. D. Efficient Gene Disruption in  
616 Diverse Strains of *Toxoplasma gondii* Using CRISPR/CAS9. *MBio.* **5** (3), (2014).
- 617 25 Janssen, B. D. *et al.* CRISPR/Cas9-mediated gene modification and gene knock  
618 out in the human-infective parasite *Trichomonas vaginalis*. *Sci Rep.* **8** (1), 270,  
619 (2018).
- 620 26 Spillman, N. J., Beck, J. R., Ganesan, S. M., Niles, J. C. & Goldberg, D. E. The  
621 chaperonin TRiC forms an oligomeric complex in the malaria parasite cytosol.  
622 *Cell Microbiol.* **19** (6), (2017).
- 623 27 Brancucci, N. M. B. *et al.* Lysophosphatidylcholine Regulates Sexual Stage  
624 Differentiation in the Human Malaria Parasite *Plasmodium falciparum*. *Cell.*  
625 10.1016/j.cell.2017.10.020, (2017).
- 626 28 Ng, C. L. *et al.* CRISPR-Cas9-modified *pfmdr1* protects *Plasmodium falciparum*  
627 asexual blood stages and gametocytes against a class of piperazine-containing  
628 compounds but potentiates artemisinin-based combination therapy partner drugs.  
629 *Mol Microbiol.* **101** (3), 381-393, (2016).
- 630 29 Lim, M. Y. *et al.* UDP-galactose and acetyl-CoA transporters as *Plasmodium*  
631 multidrug resistance genes. *Nat Microbiol.* 10.1038/nmicrobiol.2016.166 16166,  
632 (2016).
- 633 30 Adjalley, S. H. *et al.* Quantitative assessment of *Plasmodium falciparum* sexual  
634 development reveals potent transmission blocking activity by methylene blue.  
635 *PNAS.* **108** (47), E1214-E1223, (2011).
- 636 31 Sidik, S. M. *et al.* A Genome-wide CRISPR Screen in *Toxoplasma* Identifies  
637 Essential Apicomplexan Genes. *Cell.* **166** (6), 1423-1435 e1412, (2016).
- 638 32 Amberg-Johnson, K. *et al.* Small molecule inhibition of apicomplexan FtsH1  
639 disrupts plastid biogenesis in human pathogens. *Elife.* **6**, (2017).
- 640 33 Crawford, E. D. *et al.* Plasmid-free CRISPR/Cas9 genome editing in *Plasmodium*  
641 *falciparum* confirms mutations conferring resistance to the dihydroisoquinolone  
642 clinical candidate SJ733. *PLoS One.* **12** (5), e0178163, (2017).  
643

**A**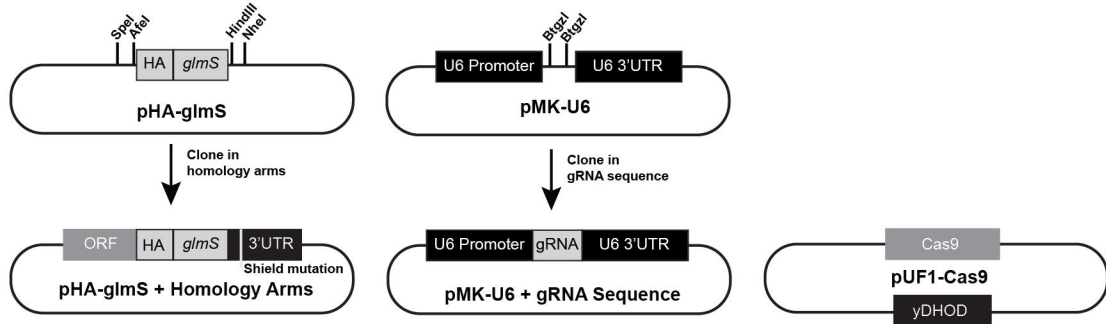**B**

**PfHsp70x gRNA oligo cloned into pMK-U6:**

5'-taagtataataattTGCATTATTGTTGTATATTTgttttagagctagaa-3'

**Genomic target of PfHsp70x gRNA + the PAM:**

5'-TGCATTATTGTTGTATATTTTGG-3'  
PAM

**Genomic target of PfHsp70x gRNA + Shield Mutation in the PAM**

5'-TGCATTATTGTTGTATATTTCG-3'  
Shield Mutation



**A**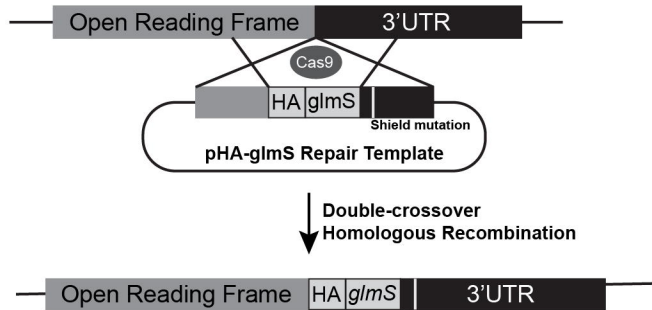**B**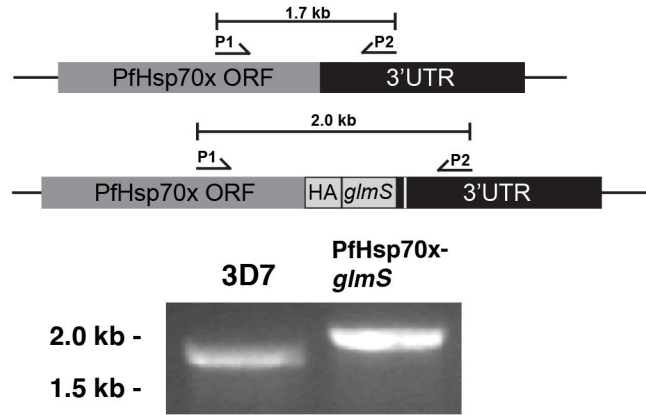

**A**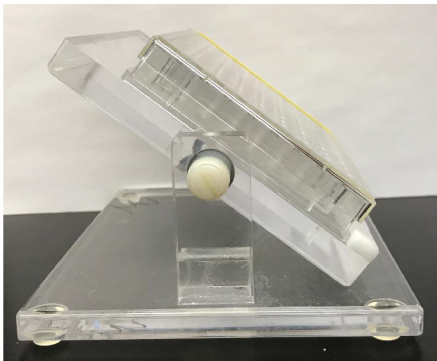**B**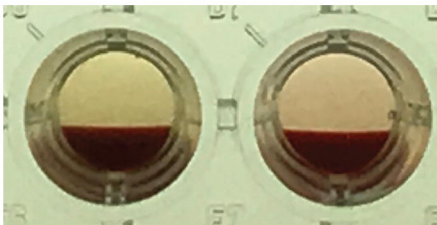

+Parasites

-Parasites

**A**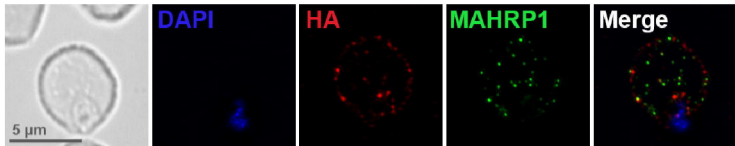**B**

**PfHsp70x-*glmS***

**Hours: 0 24 48**

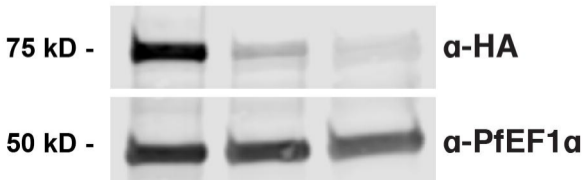

**A**

Parasite genome:

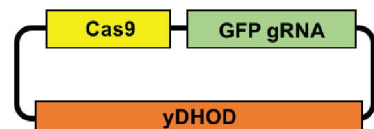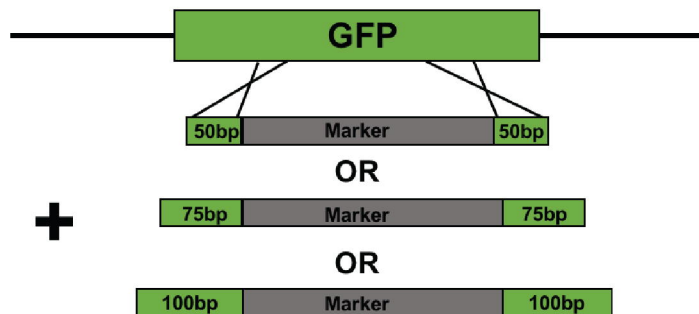

+

Homology  
Directed Repair

Modified Genome:

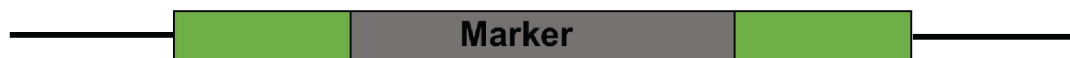**B**

Parental:

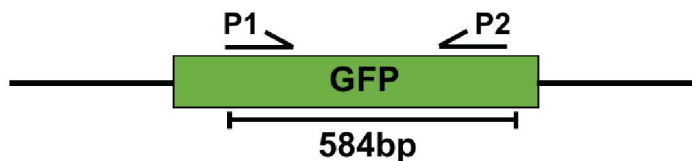

Modified Genome:

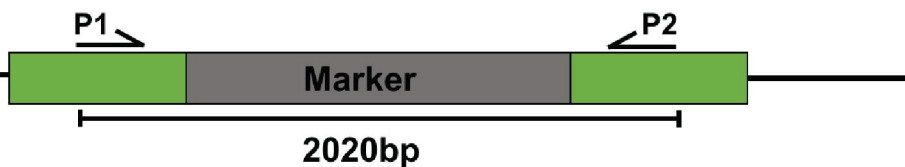

Parental 50bp HR 1 50bp HR 2 75bp HR 1 75bp HR 2 100bp HR 1 100bp HR 2      Parental 50bp HR 1 50bp HR 2 75bp HR 1 75bp HR 2 100bp HR 1 100bp HR 2

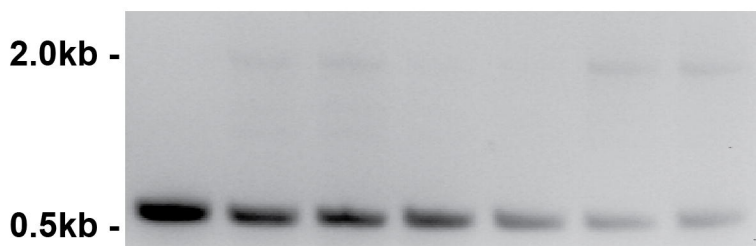

5 days post-transfection

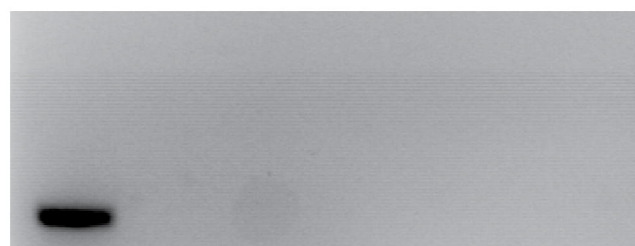

2 months post-transfection
